# Supplementary material for: Atomic layer deposition of metal oxides for efficient perovskite single-junction and perovskite/silicon tandem solar cells
Source: Royal Society of Chemistry journal article supplement (doi:10.1039/d0ra00939c), 2020-01-01
Supplement: d0ra00939c1.pdf [file d0ra00939c1.pdf]

Supplementary Information

**Atomic Layer Deposition of Metal Oxides for Efficient Perovskite  
Single-junction and Perovskite/Silicon Tandem Solar Cells**

Mohammad I. Hossain<sup>1,2,†</sup>, Adnan Mohammad<sup>2,†</sup>, Wayesh Qarony<sup>1</sup>, Saidjafarzoda  
Ilhom<sup>2</sup>, Deepa R. Shukla<sup>2,3</sup>, Dietmar Knipp<sup>4,\*</sup>, Necmi Biyikli<sup>2,\*</sup>, Yuen Hong Tsang<sup>1,\*</sup>

1.) Department of Applied Physics, The Hong Kong Polytechnic University, Hung  
Hom, Kowloon, Hong Kong

2.) Department of Electrical and Computer Engineering, University of Connecticut,  
Storrs, CT 06269, USA

3.) Department of Materials Science and Engineering, University of Connecticut,  
Storrs, CT 06269, USA

4.) Geballe Laboratory for Advanced Materials, Department of Materials Science  
and Engineering, Stanford University, Stanford, CA 94305, USA

†: Authors equally contributed to this work

\*: Corresponding author

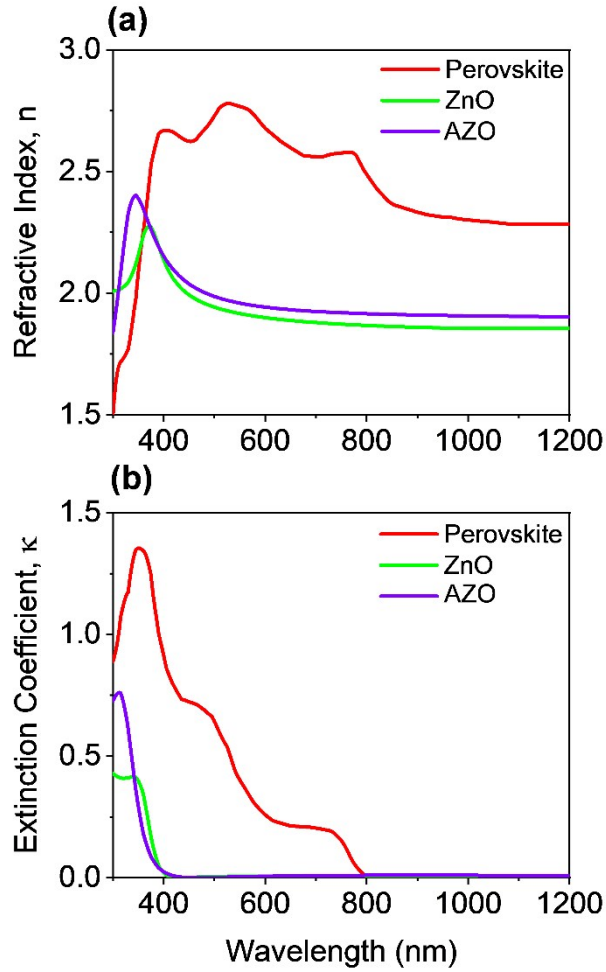

**Fig. S1** (a) Refractive index and (b) extinction coefficient of perovskite ( $\text{MAPbI}_3$ ), ZnO, and AZO for the realization of perovskite solar cells.

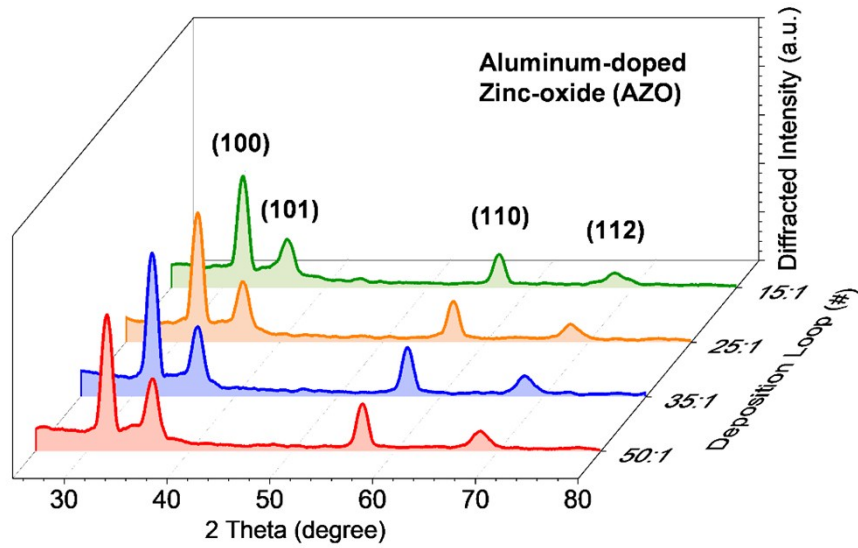

**Fig. S2** X-ray diffraction patterns of AZO films with various deposition cycles, grown on Si substrates.

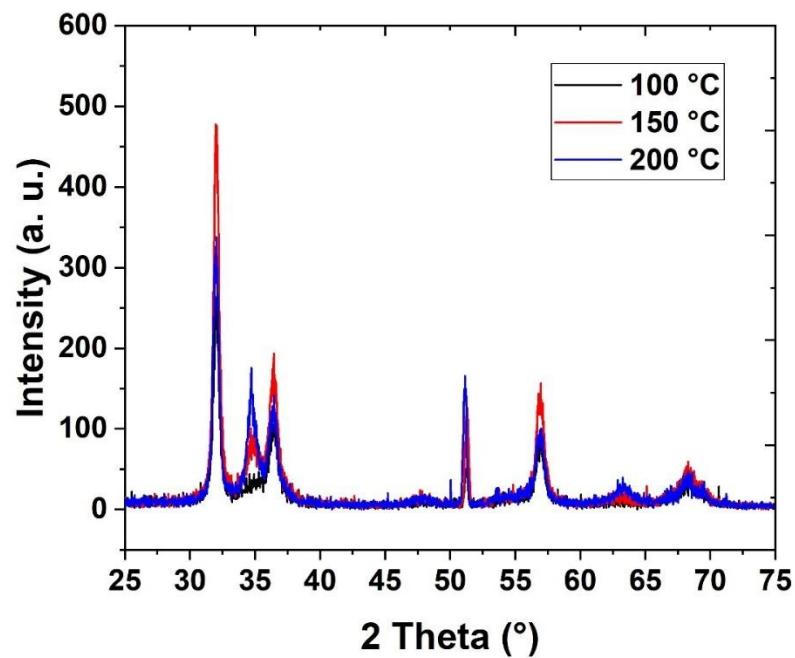

**Fig. S3** X-ray diffraction patterns of AZO films with various deposition temperatures, grown on Si substrates. The deposition cycle ratio is 25:1.

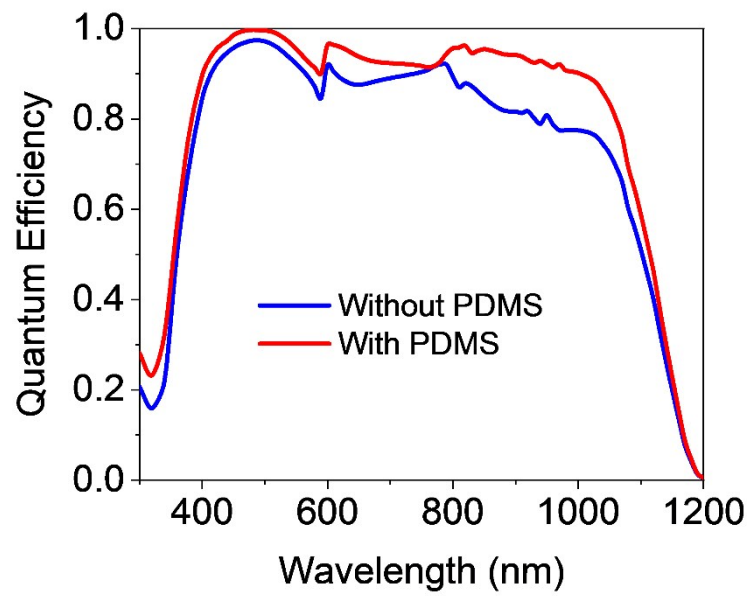

**Fig. S4** A comparison of the calculated total quantum efficiency of perovskite/silicon tandem solar cell without and with PDMS optical incoupler.
